# Supplementary material
Source: HighWire-hosted journal article supplement (https://bmjopen.bmj.com/content/7/10/e016631)
Supplement: inline-supplementary-material-1 [file inline-supplementary-material-1.pdf]

## Introduction

Interventional Oncology (IO) refers to interventional radiological techniques or procedures that require image-guidance and are used in the diagnosis, treatment and palliation of patients with cancer.

This national survey of all hospitals in the UK is to review the provision of IO services nationally and identify areas of improvement – IOUK Group

**Name of Trust:**

## Section A

**1. Is there an interventional radiology department in the above mentioned trust?**

- Yes
- No

**2. What is the name of the lead consultant?**

**3. Contact details of lead consultant:**

Tel:

Email:

**4. Are interventional oncological procedures offered in this trust?**

- Yes
- No

\*If yes proceed to Section B

\*If no proceed to Section C

## Section B

**5. Is there an interventional oncology lead at your trust?**

- Yes
- No

**6. Which categories of interventional oncological procedures are available for patients at your trust?**

(Tick most appropriate)

- Only Supportive/Symptomatic Procedures (palliative) i.e. for symptomatic relief
- Only Disease modifying (those where intent is to modify malignant progression/or modify the prognosis)
- Both

**7. What type of interventional oncology procedures are provided?**

(Tick most appropriate)

- Vascular
- Non-vascular
- Both

**8. Which supportive/symptomatic procedures are offered in your interventional radiology department:**

(Tick applicable)

- Image guided biopsy
- Central venous catheter
- Enteral tube placement e.g. radiologically inserted gastrostomy (RIG)
- Image-guided drainage e.g. abdominal or pleural drain
- Vena caval filtration
- Nephrostomy
- Ureteric stenting
- Vena caval stenting
- Gastrointestinal stenting
- Percutaneous transhepatic cholangiography (PTC)
- Biliary drainage and stenting
- Ascitic diversion e.g. peritoneovenous or peritoneo-cystic shunt/ pump
- Image-guided ablation
- Others (please specify):

**9. Which disease-modifying procedures are offered in your interventional radiology department:**

(Tick applicable)

- Image guided ablation
- Embolisation- Transcatheter arterial chemoembolization (TACE)
- Selective internal radiation therapy (SIRT)
- Isolated perfusion chemotherapy
- Other (please specify):

**If you ticked any of these please answer the following questions:**

**10. For transcatheter arterial embolization, what tumour types are treated?**

Tick applicable)

- Liver
- Kidney
- Bone
- Lung
- Prostate
- Other (please specify):

**11. Please indicate the type(s) of technology used for image-guided ablation:**

(Tick applicable)

- Microwaves ablation
- Cryoablation
- Radiofrequency ablation
- Irreversible electroporation
- Other (please specify):

**12. For image-guided ablation, what tumour types are treated?**

Tick applicable)

- Liver
- Kidney
- Bone
- Lung
- Prostate
- Breast
- Pancreases
- Other (please specify):

## Section C

**If interventional oncological procedures are not offered in your trust:**

**A. Is there a formal national pathway to an agreed recipient trust for interventional oncological procedures to be provided?**

- Yes
- No

**B. Is there a plan to offer the service or provide a formal pathway to a recipient trust in the next 12 months?**

- Yes
- No
